# Supplementary material for: The Lipoteichoic Acid-Related Proteins YqgS and LafA Contribute to the Resistance of Listeria monocytogenes to Nisin
Source: PubMed Central journal article supplement (PMC8865564; doi:10.1128/spectrum.02095-21), 2022-02-23
Supplement: spectrum02095-21_supp_1_seq4.pdf [file spectrum02095-21_supp_1_seq4.pdf]

Table S1. Strains, plasmids, and PCR primers

| Strain, primer, or plasmid   | Relevant features (Primer sequence 5'-3')                            | Source or reference |
|------------------------------|----------------------------------------------------------------------|---------------------|
| Strains                      |                                                                      |                     |
| <i>L. monocytogenes</i> EGDe | Serotype 1/2a strain; genome is sequenced                            | (1)                 |
| <i>E. coli</i> EC1000        | Cloning host strain                                                  | Invitrogen          |
| $\Delta yqgS$                | EGDe $\Delta yqgS$                                                   | This study          |
| $\Delta lafA$                | EGDe $\Delta lafA$                                                   | This study          |
| $\Delta virR$                | EGDe $\Delta virR$                                                   | Lab collection      |
| $\Delta gtcA$                | EGDe $\Delta gtcA$                                                   | This study          |
| $\Delta lmo1464$             | EGDe $\Delta lmo1464$                                                | This study          |
| Plasmids                     |                                                                      |                     |
| pGPA2                        | mariner delivery vector; Cm <sup>r</sup> ; Gm <sup>r</sup>           | (2)                 |
| pWS3                         | Temperature-sensitive integration vector; Spc <sup>r</sup>           | (3)                 |
| pWS3-erm-cre                 | Temperature-sensitive integration vector; Ery <sup>r</sup>           | This study          |
| Primers                      |                                                                      |                     |
| pAT392_lox66_genta_F         | TACCGTTCGTATAGCATAACATTATACGA<br>AGTTATGATAAACCCAGCGAACCATTT<br>GAGG | (3)                 |
| pAT392_lox71_genta_R         | TACCGTTCGTATAATGTATGCTATACGA<br>AGTTATTCAATCTTTATAAGTCCTTTTAT<br>AA  | (3)                 |
| genta2_F                     | ACCTCAAGTACCGTTCGTATAGCATAACA                                        | This study          |
| genta2_R                     | GTGTAGCTTACCGTTCGTATAATGTATG                                         | This study          |
| Genta2_1_R                   | TCAAGGCAATCTGCCTCCTCA                                                | This study          |
| Genta2_2_F                   | ATGGAAAGACTAAATGCAACAACA                                             | This study          |
| pWS3_gm_ud_F1                | GGGGATTTTATGCGTGAGAA                                                 | This study          |
| pWS3_gm_ud_R1                | GCTTCCAAGGAGCTAAAGAGG                                                | This study          |
| <i>yqgS</i> _up_F            | AAGCTGAATTCCTGCAGCCCCGGGGAT<br>CAAAGTCATCGCA                         | This study          |
| <i>yqgS</i> _up_R            | TGTATGCTATACGAACGGTACTTGAGGT<br>ACGCTTTGACGCTAGCCGAA                 | This study          |
| <i>yqgS</i> _down_F          | GCATACATTATACGAACGGTAAGCTACA<br>CAGCAGGTCCATTCCAAGTGC                | This study          |
| <i>yqgS</i> _down_R          | CTAGAACTAGTGGATCCCCCTCGCTGC<br>AATCACGAAGGAA                         | This study          |
| Check_ <i>yqgS</i> _F        | GAACCAGCTGAAGGTACGGT                                                 | This study          |
| Check_ <i>yqgS</i> _R        | ACTGCAAGCCCGTATTCCAA                                                 | This study          |
| <i>lafA</i> _up_F            | AAGCTGAATTCCTGCAGCCCCGAGCA<br>AGTTCCTTCTCTGT                         | This study          |

|                          |                                                           |            |
|--------------------------|-----------------------------------------------------------|------------|
| <i>lafA</i> _up_R        | TGTATGCTATACGAACGGTACTTGAGGT<br>ACGTTCAAAGGAAAGAGAGGTC    | This study |
| <i>lafA</i> _down_F      | GCATACATTATACGAACGGTAAGCTACA<br>CTGCGGACTGTAGGTATCCGT     | This study |
| <i>lafA</i> _down_R      | CTAGA ACTAGTGGATCCCCAAGTAAT<br>CGGCCCTGGTGTG              | This study |
| Check_ <i>lafA</i> _F    | GAAAATCCGCCTGCCCAAAC                                      | This study |
| Check_ <i>lafA</i> _R    | CCGAACTTACAGGTGCTCCA                                      | This study |
| <i>gtcA</i> _up_F        | AAGCTGAATTCCTGCAGCCCCCAGCAA<br>AAGCTGAGTGCG               |            |
| <i>gtcA</i> _up_R        | TGTATGCTATACGAACGGTACTTGAGGT<br>ATGGGCAAAAATTTGGACGAA     | This study |
| <i>gtcA</i> _down_F      | GCATACATTATACGAACGGTAAGCTACA<br>CACCACGGAATCTTGTCTAACCAT  | This study |
| <i>gtcA</i> _down_R      | CTAGA ACTAGTGGATCCCCAAACCCC<br>GGTTCTTCCAGAT              | This study |
| Check_ <i>gtcA</i> _F    | TGCTTCCACTTGAAAACCTCCT                                    | This study |
| Check_ <i>gtcA</i> _R    | ACAACATCCGCCAGAGCTAA                                      | This study |
| <i>lmo1464</i> _up_F     | AAGCTGAATTCCTGCAGCCCACCGTCG<br>CTGTTTTTCCTGT              | This study |
| <i>lmo1464</i> _up_R     | TGTATGCTATACGAACGGTACTTGAGGT<br>AGCGGTACTGTTAGCAGCAAT     | This study |
| <i>lmo1464</i> _down_F   | GCATACATTATACGAACGGTAAGCTACA<br>CAAAAGCATGATGAAAAGATTCTGC | This study |
| <i>lmo1464</i> _down_R   | CTAGA ACTAGTGGATCCCCCAGGAGGG<br>CAAAAGATGACGG             | This study |
| Check_ <i>lmo1464</i> _F | TGTGAATGCGCCTGGTAAAA                                      | This study |
| Check_ <i>lmo1464</i> _R | TCTTCCACAGACCAACCAT                                       | This study |

Table S2. *L. monocytogenes* genes involved in nisin resistance were determined by Tn-seq analysis.

| ORF                       | Gene        | Product                                                        | Fold    | BH       |
|---------------------------|-------------|----------------------------------------------------------------|---------|----------|
| <b>Cell wall envelope</b> |             |                                                                |         |          |
| <i>lmo2477</i>            | <i>galE</i> | UDP-glucose 4-epimerase                                        | 5851.31 | 0.00E+00 |
| <i>lmo2554</i>            | <i>lafB</i> | galactosyltransferase                                          | 521.46  | 3.78E-10 |
| <i>lmo0644</i>            | <i>yqgS</i> | glycolipid synthesis protein                                   | 343.00  | 2.10E-10 |
| <i>lmo2555</i>            | <i>lafA</i> | N-acetylglucosaminyl-phosphatidylinositol biosynthesis protein | 135.98  | 2.05E-09 |
| <i>lmo1695</i>            | <i>mprF</i> | hypothetical protein                                           | 10.92   | 2.13E-06 |
| <i>lmo2229</i>            | <i>pbp2</i> | penicillin-binding protein                                     | 6.69    | 8.51E-05 |
| <i>lmo0974</i>            | <i>dltA</i> | D-alanine--poly(phosphoribitol) ligase subunit 1               | 6.64    | 2.45E-02 |

|                                        |             |                                                 |        |          |
|----------------------------------------|-------------|-------------------------------------------------|--------|----------|
| <i>lmo2553</i>                         | <i>lafC</i> | hypothetical protein                            | 6.54   | 2.70E-05 |
| <i>lmo0855</i>                         | <i>ddl</i>  | D-alanyl-alanine synthetase A                   | 6.43   | 9.01E-05 |
| <i>lmo2505</i>                         | <i>spl</i>  | peptidoglycan lytic protein P45                 | 6.18   | 2.66E-04 |
| <i>lmo2427</i>                         | <i>ftsW</i> | cell division protein FtsW                      | 5.31   | 1.04E-05 |
| <b>regulator</b>                       |             |                                                 |        |          |
| <i>lmo1745</i>                         | <i>virR</i> | two-component response regulator                | 121.05 | 8.34E-09 |
| <i>lmo1022</i>                         | <i>liaR</i> | two-component response regulator                | 77.68  | 1.61E-06 |
| <i>lmo0989</i>                         |             | MarR family transcriptional regulator           | 44.69  | 1.22E-03 |
| <i>lmo1693</i>                         | <i>recX</i> | recombination regulator RecX                    | 22.93  | 9.51E-03 |
| <i>lmo1262</i>                         |             | transcriptional regulator                       | 11.09  | 6.85E-06 |
| <i>lmo0371</i>                         |             | GntR family transcriptional regulator           | 10.93  | 7.36E-07 |
| <i>lmo0229</i>                         |             | CtsR family transcriptional regulator           | 9.20   | 5.96E-04 |
| <i>lmo0651</i>                         |             | transcriptional regulator                       | 8.16   | 5.12E-04 |
| <i>lmo0031</i>                         |             | LacI family transcription regulator             | 7.36   | 1.56E-05 |
| <i>lmo2493</i>                         |             | ArsR family transcriptional regulator           | 6.61   | 7.09E-05 |
| <b>ABC transporter</b>                 |             |                                                 |        |          |
| <i>lmo2115</i>                         | <i>anrB</i> | ABC transporter permease                        | 157.10 | 2.10E-10 |
| <i>lmo2114</i>                         | <i>anrA</i> | ABC transporter ATP-binding protein             | 131.39 | 4.47E-07 |
| <i>lmo1746</i>                         | <i>virB</i> | ABC transporter permease                        | 35.71  | 2.03E-06 |
| <i>lmo2768</i>                         |             | hypothetical protein                            | 21.54  | 1.40E-06 |
| <i>lmo2769</i>                         |             | ABC transporter ATP-binding protein             | 13.72  | 4.47E-07 |
| <i>lmo1740</i>                         |             | amino acid ABC transporter permease             | 13.62  | 7.17E-05 |
| <i>lmo2125</i>                         |             | sugar ABC transporter substrate-binding protein | 7.55   | 3.42E-05 |
| <b>Phosphotransferase system (PTS)</b> |             |                                                 |        |          |
| <i>lmo0916</i>                         |             | PTS sugar transporter subunit IIA               | 16.50  | 4.85E-05 |
| <i>lmo0024</i>                         |             | PTS mannose transporter subunit IID             | 7.49   | 1.97E-05 |
| <i>lmo2649</i>                         | <i>ulaA</i> | PTS system ascorbate transporter subunit IIC    | 6.61   | 9.65E-06 |
| <i>lmo1971</i>                         | <i>ulaA</i> | PTS ascorbate transporter subunit IIC           | 6.09   | 2.50E-02 |
| <i>lmo0021</i>                         |             | PTS fructose transporter subunit IIA            | 5.52   | 7.17E-05 |
| <i>lmo0301</i>                         |             | PTS beta-glucoside transporter subunit IIA      | 5.01   | 1.87E-03 |
| <b>DNA repair</b>                      |             |                                                 |        |          |
| <i>lmo1320</i>                         | <i>polC</i> | DNA polymerase III PolC                         | 6.47   | 3.73E-02 |
| <i>lmo1275</i>                         | <i>topA</i> | DNA topoisomerase I                             | 6.04   | 3.37E-03 |
| <i>lmo2523</i>                         |             | single-strand DNA-binding protein               | 5.26   | 7.09E-05 |
| <b>Secondary metabolites synthesis</b> |             |                                                 |        |          |
| <i>lmo1809</i>                         | <i>plsX</i> | glycerol-3-phosphate acyltransferase PlsX       | 390.97 | 3.78E-10 |
| <i>lmo2212</i>                         | <i>hemE</i> | uroporphyrinogen decarboxylase                  | 25.56  | 2.50E-04 |
| <i>lmo1557</i>                         | <i>hemA</i> | glutamyl-tRNA reductase                         | 24.91  | 7.28E-07 |
| <i>lmo2211</i>                         | <i>hemH</i> | ferrochelatase                                  | 8.87   | 4.58E-02 |

|                                  |             |                                                |        |          |
|----------------------------------|-------------|------------------------------------------------|--------|----------|
| <i>lmo0884</i>                   |             | protoporphyrinogen oxidase                     | 7.57   | 2.03E-04 |
| <i>lmo1556</i>                   | <i>hemC</i> | porphobilinogen deaminase                      | 6.45   | 4.51E-03 |
| <i>lmo1932</i>                   |             | heptaprenyl diphosphate synthase subunit I     | 6.01   | 7.39E-03 |
| <i>lmo2113</i>                   |             | heme peroxidase                                | 5.37   | 1.39E-03 |
| <b>Oxidative phosphorylation</b> |             |                                                |        |          |
| <i>lmo2535</i>                   | <i>atpB</i> | ATP synthase F0F1 subunit A                    | 69.11  | 7.19E-08 |
| <i>lmo2531</i>                   | <i>atpA</i> | ATP synthase F0F1 subunit alpha                | 44.08  | 4.13E-06 |
| <i>lmo2532</i>                   | <i>atpH</i> | ATP synthase F0F1 subunit delta                | 20.30  | 4.03E-05 |
| <i>lmo2530</i>                   | <i>atpG</i> | ATP synthase F0F1 subunit gamma                | 15.92  | 1.71E-05 |
| <i>lmo2529</i>                   | <i>atpD</i> | ATP synthase F0F1 subunit beta                 | 9.63   | 5.96E-05 |
| <b>Others</b>                    |             |                                                |        |          |
| <i>lmo1229</i>                   |             | hypothetical protein                           | 415.25 | 6.85E-06 |
| <i>lmo2485</i>                   |             | hypothetical protein                           | 396.50 | 2.10E-10 |
| <i>lmo1249</i>                   |             | hypothetical protein                           | 191.15 | 1.14E-04 |
| <i>lmo1967</i>                   | <i>tela</i> | toxic ion resistance protein                   | 114.52 | 2.22E-08 |
| <i>lmo1841</i>                   |             | hypothetical protein                           | 93.01  | 1.02E-02 |
| <i>lmo1966</i>                   |             | hypothetical protein                           | 90.88  | 9.01E-07 |
| <i>lmo0290</i>                   | <i>yycI</i> | hypothetical protein                           | 63.11  | 4.16E-09 |
| <i>lmo2503</i>                   |             | cardiolipin synthase                           | 41.87  | 4.11E-08 |
| <i>lmo2811</i>                   | <i>trmE</i> | tRNA modification GTPase TrmE                  | 26.17  | 2.04E-03 |
| <i>lmo2156</i>                   |             | hypothetical protein                           | 25.13  | 9.20E-07 |
| <i>lmo0289</i>                   | <i>yycH</i> | hypothetical protein                           | 23.84  | 4.47E-07 |
| <i>lmo1757</i>                   |             | hypothetical protein                           | 20.46  | 9.40E-07 |
| <i>lmo1496</i>                   | <i>greA</i> | transcription elongation factor GreA           | 18.95  | 2.73E-02 |
| <i>lmo2473</i>                   |             | hypothetical protein                           | 18.31  | 7.73E-07 |
| <i>lmo1289</i>                   |             | internalin                                     | 14.77  | 3.08E-05 |
| <i>lmo0261</i>                   |             | phospho-beta-glucosidase                       | 14.59  | 2.27E-07 |
| <i>lmo2041</i>                   | <i>mraW</i> | S-adenosyl-methyltransferase MraW              | 12.43  | 4.44E-05 |
| <i>lmo2077</i>                   |             | glycoprotease                                  | 12.23  | 2.22E-02 |
| <i>lmo0167</i>                   |             | hypothetical protein                           | 10.81  | 1.32E-04 |
| <i>lmo2468</i>                   | <i>clpP</i> | ATP-dependent Clp protease proteolytic subunit | 10.53  | 2.48E-02 |
| <i>lmo1215</i>                   |             | N-acetylmuramoyl-L-alanine amidase             | 10.22  | 2.97E-04 |
| <i>lmo2101</i>                   |             | pyridoxal biosynthesis lyase PdxS              | 10.18  | 4.08E-02 |
| <i>lmo0052</i>                   |             | hypothetical protein                           | 9.45   | 2.86E-05 |
| <i>lmo1432</i>                   |             | hypothetical protein                           | 9.20   | 3.72E-02 |
| <i>lmo0737</i>                   |             | hypothetical protein                           | 8.70   | 5.98E-03 |
| <i>lmo0963</i>                   | <i>htpX</i> | heat shock protein HtpX                        | 8.04   | 7.28E-06 |
| <i>lmo1272</i>                   | <i>rbgA</i> | ribosomal biogenesis GTPase                    | 7.67   | 2.29E-04 |
| <i>lmo1888</i>                   |             | hypothetical protein                           | 7.34   | 1.14E-06 |
| <i>lmo0072</i>                   |             | hypothetical protein                           | 7.34   | 2.19E-04 |
| <i>lmo1842</i>                   |             | hypothetical protein                           | 7.00   | 6.48E-03 |

|                 |                 |                                     |      |          |
|-----------------|-----------------|-------------------------------------|------|----------|
| <i>lmo1854</i>  |                 | hypothetical protein                | 6.72 | 7.87E-06 |
| <i>lmo1484</i>  | <i>comEA</i>    | competence protein ComEA            | 6.46 | 7.17E-04 |
| <i>lmo1820</i>  |                 | serine/threonine protein kinase     | 6.33 | 8.79E-05 |
| <i>lmo0962</i>  | <i>lemA</i>     | LemA protein                        | 6.23 | 6.00E-05 |
| <i>lmo1598</i>  | <i>tyrS</i>     | tyrosyl-tRNA synthetase             | 5.77 | 1.08E-02 |
| <i>lmo1800</i>  |                 | protein-tyrosine phosphatase        | 5.77 | 1.01E-04 |
| <i>lmo0583</i>  | <i>azi, div</i> | preprotein translocase subunit SecA | 5.69 | 6.54E-05 |
| <i>lmo0954</i>  |                 | hypothetical protein                | 5.61 | 1.89E-04 |
| <i>lmo2484</i>  |                 | hypothetical protein                | 5.48 | 7.28E-06 |
| <i>lmo2406</i>  |                 | hypothetical protein                | 5.48 | 1.93E-04 |
| <i>lmo02333</i> |                 | hypothetical protein                | 5.40 | 1.14E-04 |

Table S3. *L. monocytogenes* genes related to nisin sensitivity as identified by Tn-seq analysis.

| ORF            | Gene        | Product                                               | Fold | BH       |
|----------------|-------------|-------------------------------------------------------|------|----------|
| <i>Lmo0215</i> |             | hypothetical protein                                  | 0.15 | 7.28E-07 |
| <i>lmo0653</i> |             | hypothetical protein                                  | 0.14 | 3.23E-05 |
| <i>lmo0955</i> |             | hypothetical protein                                  | 0.11 | 3.51E-05 |
| <i>lmo1464</i> |             | diacylglycerol kinase                                 | 0.06 | 6.85E-06 |
| <i>lmo2258</i> |             | hypothetical protein                                  | 0.09 | 2.92E-07 |
| <i>lmo2380</i> |             | monovalent cation/H <sup>+</sup> antiporter subunit C | 0.11 | 2.50E-02 |
| <i>lmo2549</i> | <i>gtcA</i> | wall teichoic acid glycosylation protein GtcA         | 0.15 | 1.21E-05 |

1. Glaser P, Frangeul L, Buchrieser C, Rusniok C, Amend A, Baquero F, Berche P, Bloecker H, Brandt P, Chakraborty T, Charbit A, Chetouani F, Couve E, de Daruvar A, Dehoux P, Domann E, Dominguez-Bernal G, Duchaud E, Durant L, Dussurget O, Entian KD, Fsihi H, Garcia-del Portillo F, Garrido P, Gautier L, Goebel W, Gomez-Lopez N, Hain T, Hauf J, Jackson D, Jones LM, Kaerst U, Kreft J, Kuhn M, Kunst F, Kurapkat G, Madueno E, Maitournam A, Vicente JM, Ng E, Nedjari H, Nordsiek G, Novella S, de Pablos B, Perez-Diaz JC, Purcell R, Rimmel B, Rose M, Schlueter T, Simoes N, et al. 2001. Comparative genomics of *Listeria* species. *Science* 294:849-52.
2. Zhang X, de Maat V, Guzman Prieto AM, Praisnar TK, Bayjanov JR, de Been M, Rogers MRC, Bonten MJM, Mesnage S, Willems RJL, van Schaik W. 2017. RNA-seq and Tn-seq reveal fitness determinants of vancomycin-resistant *Enterococcus faecium* during growth in human serum. *BMC Genomics* 18:893.
3. Zhang X, Paganelli FL, Bierschenk D, Kuipers A, Bonten MJ, Willems RJ, van Schaik W. 2012. Genome-wide identification of ampicillin resistance determinants in *Enterococcus faecium*. *PLoS Genet* 8:e1002804.
